# Supplementary material for: Beneficial Microorganisms and Water Stress Influence Quercus ilex Seedlings’ Response to Phytophthora cinnamomi Rands
Source: MDPI journal article supplement (doi:10.3390/f14050870), 2023-04-24
Supplement: s1 [file s1]

# Beneficial Microorganisms and Water Stress Influence *Quercus ilex* Seedlings' Response to *Phytophthora cinnamomi* Rands

Roberto J. Cabrera-Puerto, Francisco J. Ruiz-Gómez \* and Rafael M. Navarro-Cerrillo

## Supplementary material

**Table S1.** Beneficial microorganisms composition of T-complex.

| Species                           | Concentration<br>UFC/ml          | Taxa          |
|-----------------------------------|----------------------------------|---------------|
| <i>Trichoderma viride</i>         | 2-4 10 <sup>5</sup>              | Fungi         |
| <i>Trichoderma harzianum</i>      | 2-4 10 <sup>5</sup>              | Fungi         |
| <i>Azospirillum brasilense</i>    | 10 <sup>8</sup> -10 <sup>9</sup> | Rizobacterias |
| <i>Rhizobium tropici</i>          | 10 <sup>8</sup> -10 <sup>9</sup> | Rizobacterias |
| <i>Pantoea ananatis</i>           | 10 <sup>8</sup> -10 <sup>9</sup> | Rizobacterias |
| <i>Pseudomonas putida</i>         | 10 <sup>8</sup> -10 <sup>9</sup> | Rizobacterias |
| <i>Pseudomonas fluorescens</i>    | 10 <sup>8</sup> -10 <sup>9</sup> | Rizobacterias |
| <i>Pseudomonas brassicasearum</i> | 10 <sup>8</sup> -10 <sup>9</sup> | Rizobacterias |
| <i>Bacillus aryabhattai</i>       | 10 <sup>8</sup> -10 <sup>9</sup> | Rizobacterias |

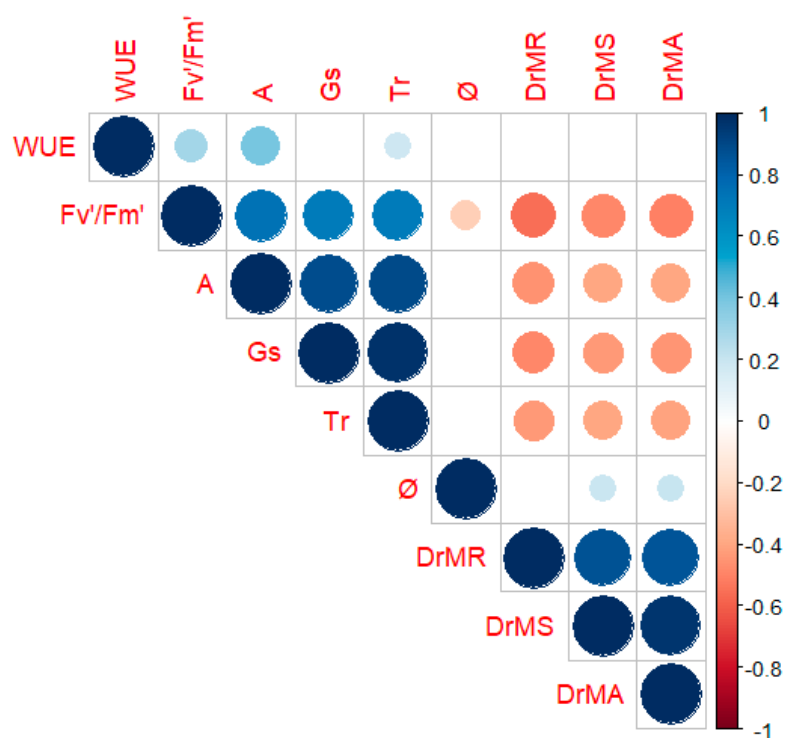

**Figure S1:** Pearson correlations of studied variables. Color intensity and size by importance of Pearson value. Positive correlations in blue and negative correlations in red.
